# Supplementary material for: Small-Molecule Ebselen Binds to YTHDF Proteins Interfering with the Recognition of N6-Methyladenosine-Modified RNAs
Source: PubMed Central journal article supplement (PMC9578143; doi:10.1021/acsptsci.2c00008), 2022-09-14
Supplement: pt2c00008_si_001.pdf [file pt2c00008_si_001.pdf]

## Supplementary Information

### The small molecule ebselen binds to YTHDF proteins interfering with the recognition of N6-methyladenosine modified RNAs

Mariachiara Micaelli<sup>1</sup>, Andrea Dalle Vedove<sup>1</sup>, Linda Cerofolini<sup>2,3</sup>, Jacopo Vigna<sup>4</sup>, Denise Sighel<sup>1</sup>, Sara Zaccara<sup>5</sup>, Isabelle Bonomo<sup>1</sup>, Georgios Poulentzas<sup>1</sup>, Emanuele Filiberto Rosatti<sup>1</sup>, Giulia Cazzanelli<sup>1</sup>, Laura Alunno<sup>1</sup>, Romina Belli<sup>6</sup>, Daniele Peroni<sup>6</sup>, Erik Dassi<sup>1</sup>, Shino Murakami<sup>5</sup>, Samie R. Jaffrey<sup>5</sup>, Marco Fragai<sup>2,3</sup>, Ines Mancini<sup>4</sup>, Graziano Lolli<sup>1</sup>, Alessandro Quattrone<sup>1\*</sup>, Alessandro Provenzani<sup>1\*</sup>

<sup>1</sup> Department of Cellular, Computational and Integrative Biology, CIBIO, University of Trento, Trento, Italy

<sup>2</sup> Magnetic Resonance Center (CERM) – Department of Chemistry “Ugo Schiff”, University of Florence, Florence, Italy

<sup>3</sup> Consorzio Interuniversitario Risonanze Magnetiche di Metalloproteine (CIRMMP), Florence, Italy

<sup>4</sup> Department of Physics, University of Trento, Trento, Italy

<sup>5</sup> Department of Pharmacology, Weill Cornell Medicine, Cornell University, New York, NY 10065, USA

<sup>6</sup> Department of Cellular, Computational and Integrative Biology, CIBIO, Mass Spectrometry Facility, University of Trento, Trento, Italy

\*co-corresponding authors

[alessandro.provenzani@unitn.it](mailto:alessandro.provenzani@unitn.it)

[alessandro.quattrone@unitn.it](mailto:alessandro.quattrone@unitn.it)

Figure S1

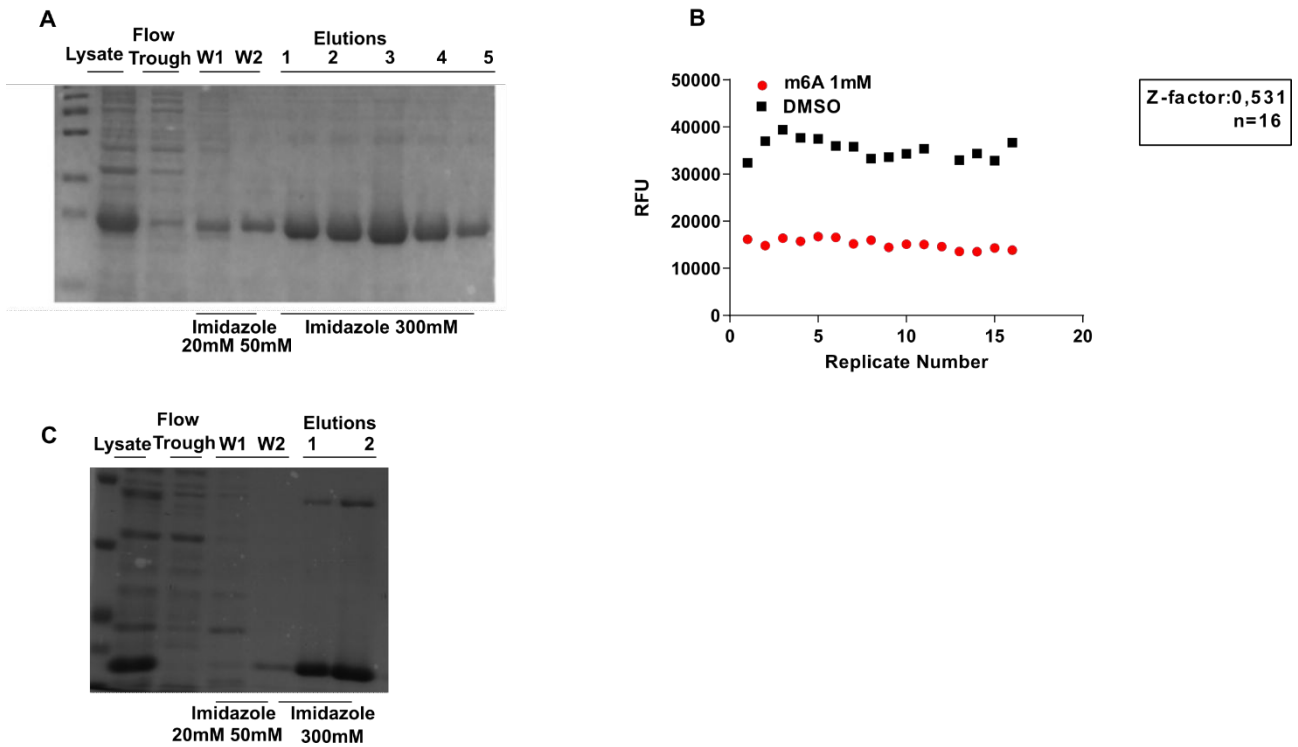

**Supplementary Figure 1. (A) Purification of the YTH domain of YTHDF1 protein.** SDS-PAGE analysis of purification steps of the YTHDF1 domain. Washing steps have been carried out using increasing concentrations of Imidazole (20mM-50mM). The five elution fractions have been obtained using 300mM of Imidazole. **(B) Calculation of the Z-factor for the quenching assay.** Quenching effect of the m6A moiety against the YTH domain has been measured in sixteen replicates, with DMSO as a negative control.  $Z=0.531$  is an indicator of an excellent assay. **(C) Purification of the YTH domain of YTHDF2 protein.** SDS-PAGE analysis of purification steps of the YTH-DF2 domain. Washing steps have been carried out using increasing concentrations of Imidazole (20mM-50mM). The two elution fractions have been obtained using 300mM of Imidazole.

**Figure S2**

**A**

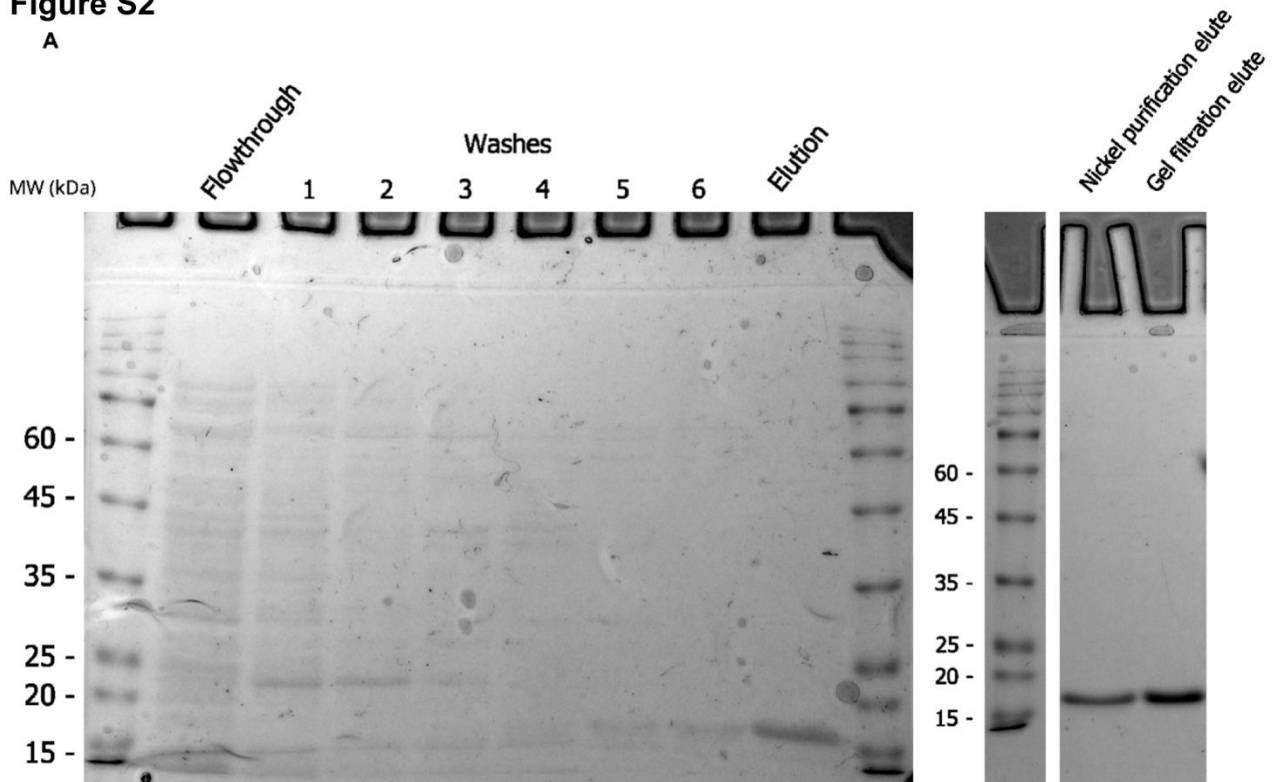

**Supplementary Figure 2. Purification of the YTH domain of YTHDC1 protein.** SDS-PAGE analysis of purification steps of the YTHDC1 domain with Coomassie Blue staining. Washing steps have been carried out using increasing concentrations of Imidazole (20mM-50mM). The elution fraction has been obtained using 300mM of Imidazole. Eluted protein was further purified by gel filtration.

Figure S3

A

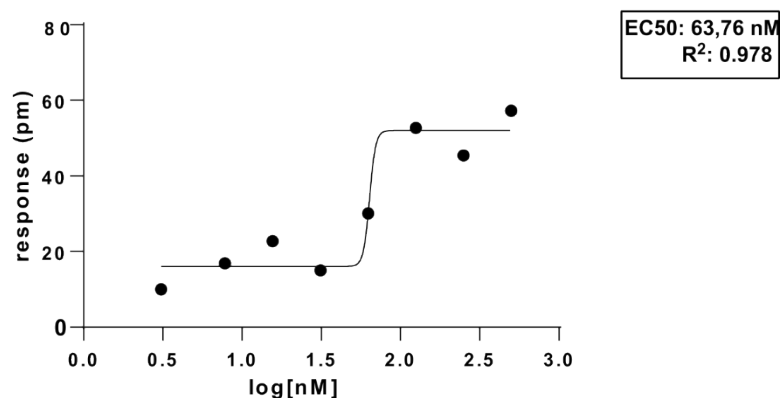

**Supplementary Figure 3. Determination of the EC50 of interaction between an m6A RNA probe with the YTH domain of YTHDF1 calculated with the DMR.** rYTH was immobilized to the wells with amino-coupled chemistry and different concentrations of RNA were added to the plate. Measurements were performed before adding the RNA, in order to define a baseline, and after the addition. Final response (pm) was obtained by subtracting to the last measurement the baseline. Signal for each well was obtained by subtracting the signal of a reference area with the protein coated to an uncoated one. Data were fitted according to a four-parameter nonlinear regression curve.  $R^2 = 0.8918$   $EC_{50} = 63.76$  nM.

**Figure S4**

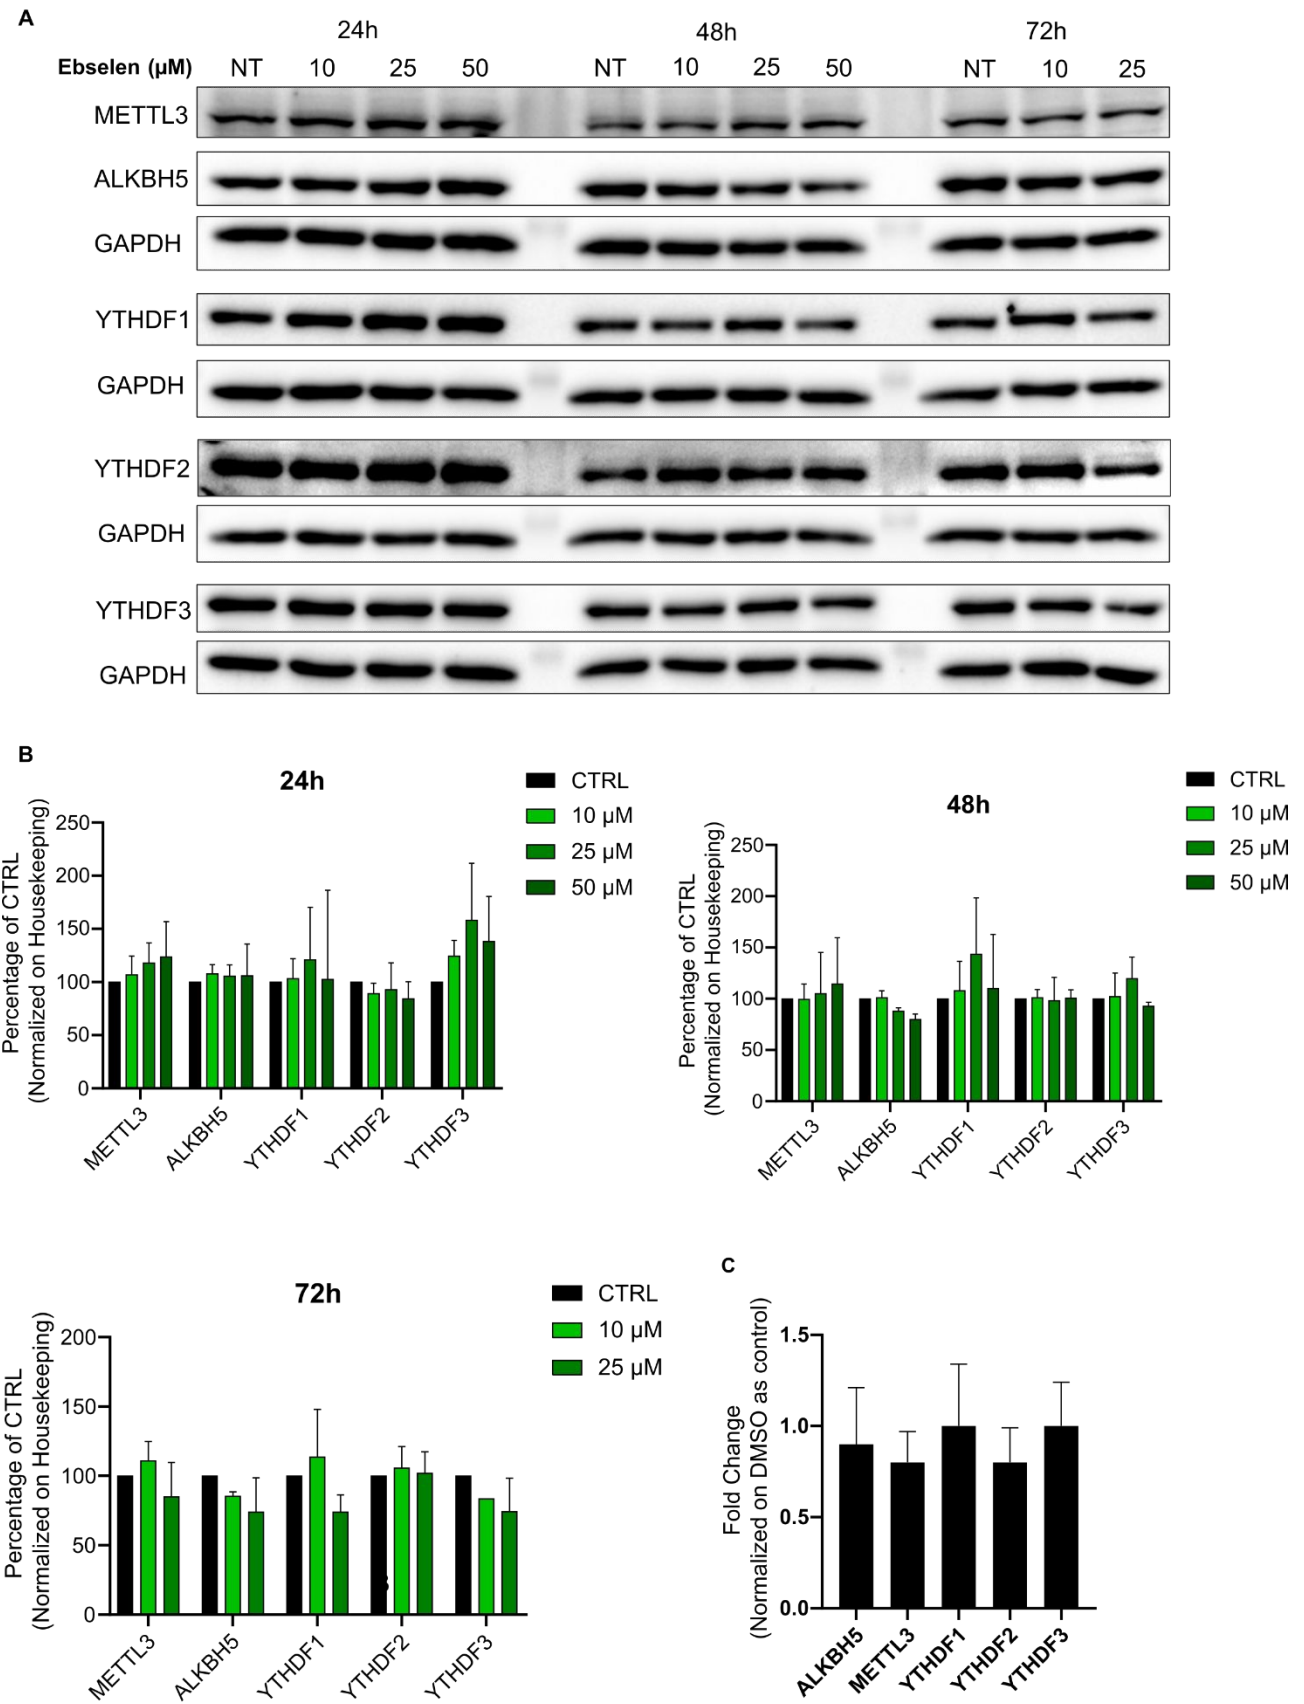

**Supplementary Figure 4. Protein level of the epitranscriptome apparatus and m6A level in PC-3 cells.** (A) Representative western blot of YTHDF1-3, ALKBH5 and METTL3 in PC-3 cells after 24, 48 and 72 hours of ebselen treatment at three doses, 10, 25, 50  $\mu\text{M}$ . (B) Quantification of the relative changes of YTHDF1-3, ALKBH5 and METTL3 in PC-3 cells after 24, 48 and 72 hours of ebselen treatment at three doses, 10, 25, 50  $\mu\text{M}$ . No changes were observed. Three biological replicates were performed. (C) Quantitative real-time PCR of YTHDF1-3, ALKBH5 and METTL3 in PC-3 cells after 24 hours of ebselen treatment at 10  $\mu\text{M}$ .

## Figure S5

A

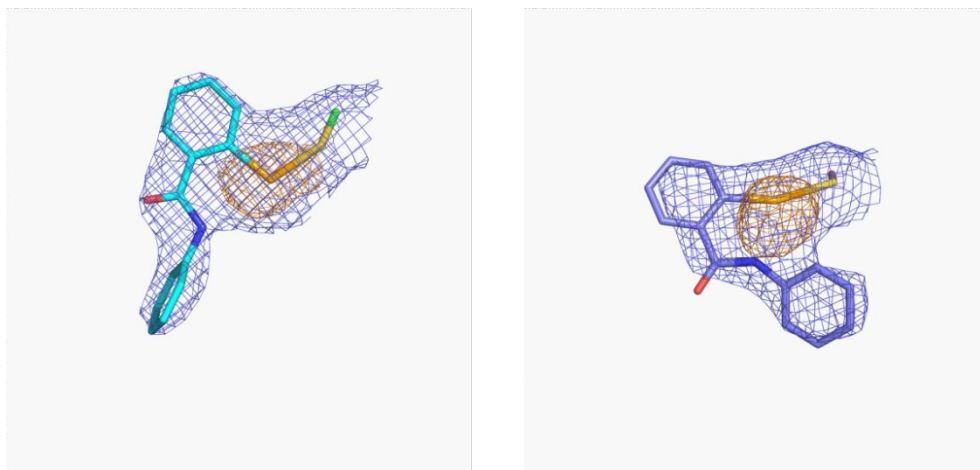

**Supplementary Figure 5.** Caption:  $2F_o - F_c$  map (blue) is contoured at  $1\sigma$  for Ebselen and Cys412 side chain. The selenium anomalous map is contoured at  $3.5\sigma$  and shown in orange.

**Figure S6**

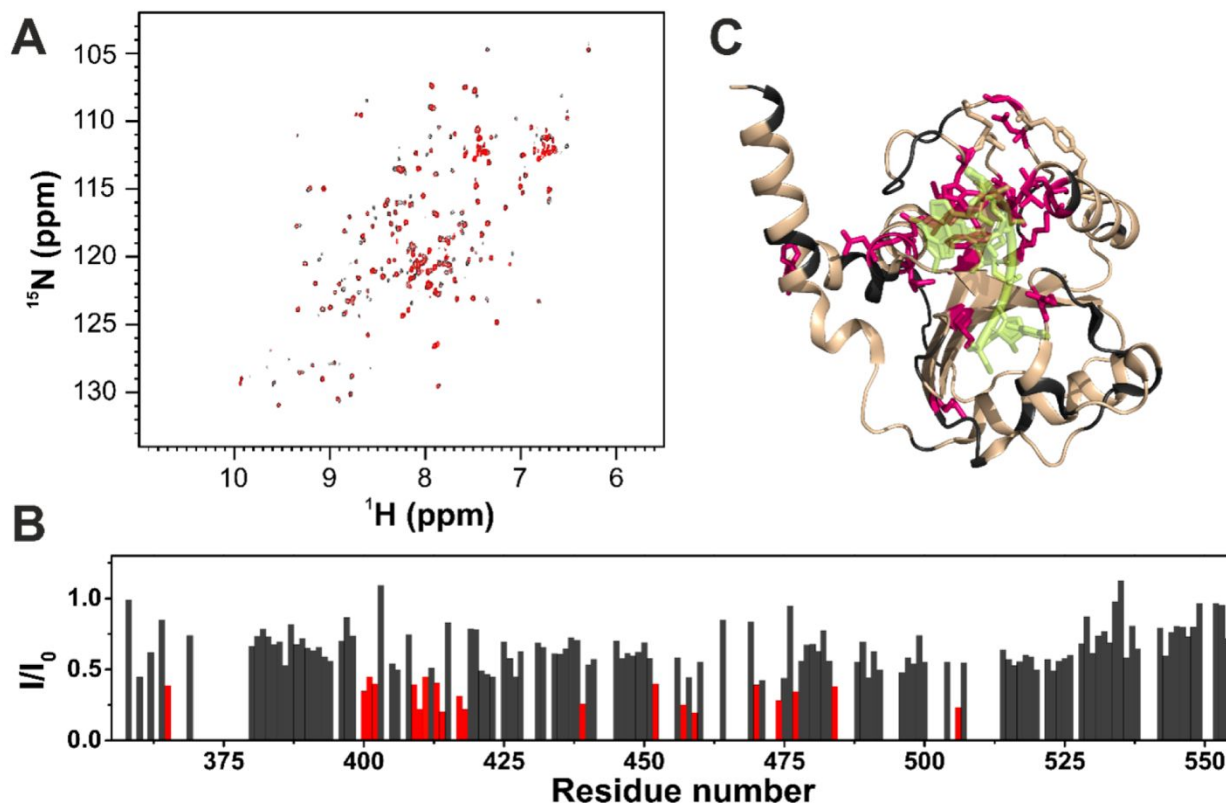

**Supplementary Figure 6. Specific interaction of a m6A containing RNA probe with the YTH domain of YTHDF1.** (A) Superimposition of 2D  $^1\text{H}$   $^{15}\text{N}$  HSQC NMR spectra of free YTH domain of YTHDF1 (100  $\mu\text{M}$ , black spectrum) and YTHDF1 in the presence of m6A-RNA (40  $\mu\text{M}$ , red spectrum). (B) Intensity decreases of the signals of the YTH domain of YTHDF1 (100  $\mu\text{M}$ ) in the presence of m6A-RNA fragment (40  $\mu\text{M}$ ); the residues exhibiting the largest decreases are highlighted in red. (C) Cartoon representation of YTH domain (PDB code: 4rcj) in complex with a shorter RNA fragment (in yellow) with respect to the one used in the NMR titration. The residue exhibiting the largest decreases in signal intensity in the presence of m6A-RNA (40  $\mu\text{M}$ ) are colored in magenta and represented as sticks; in grey unassigned residues.

Figure S7 A

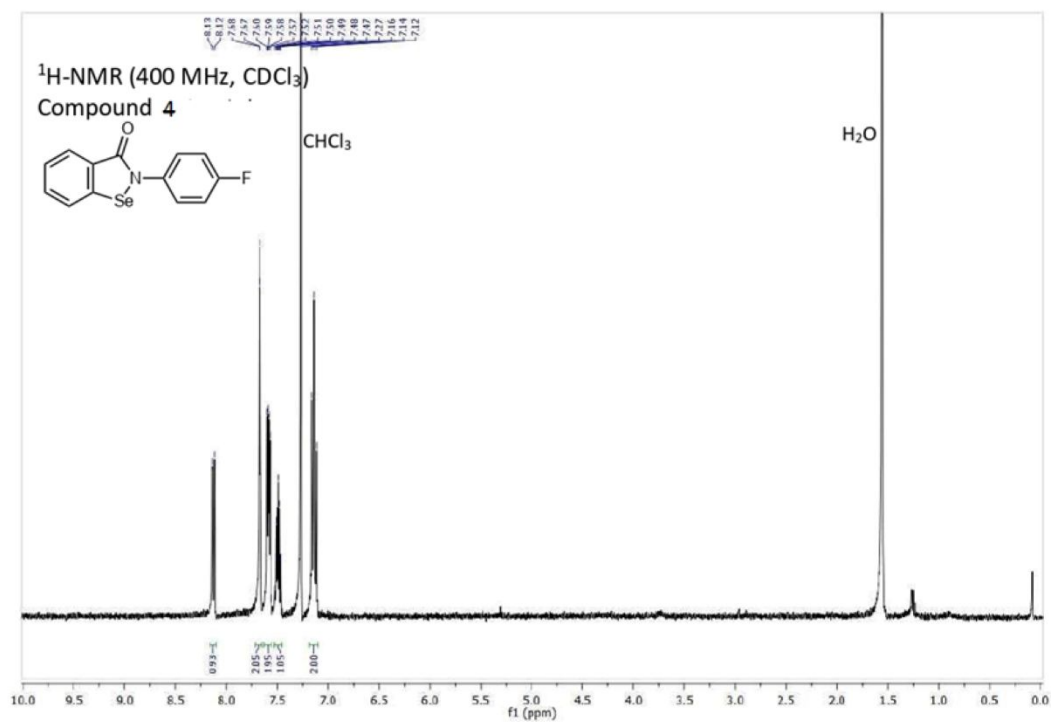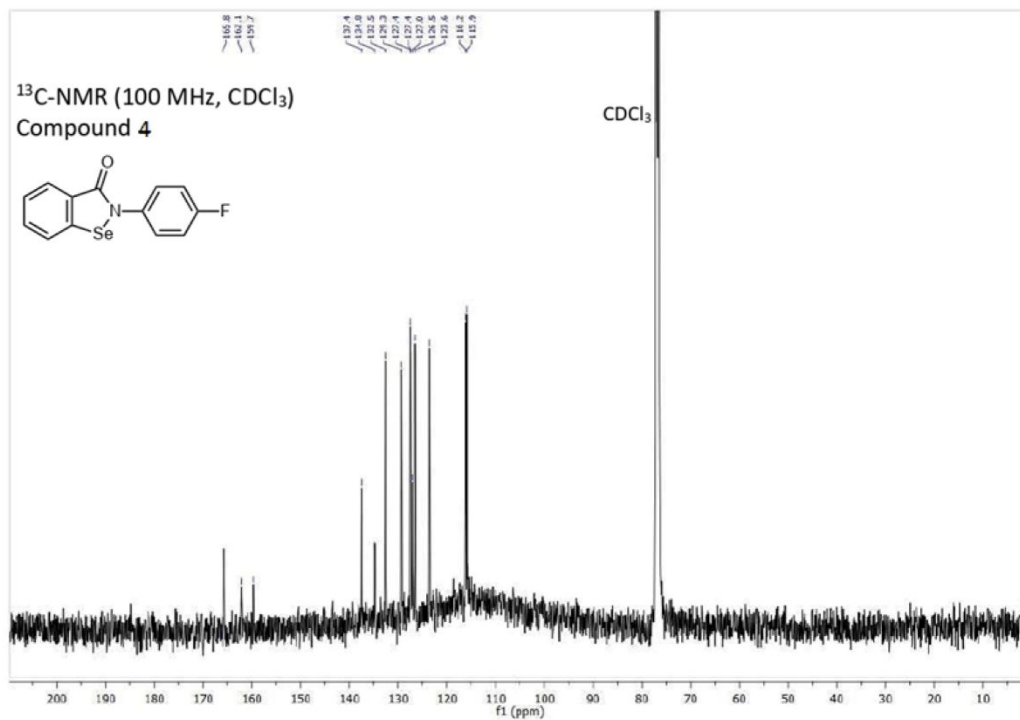



Figure S7 B

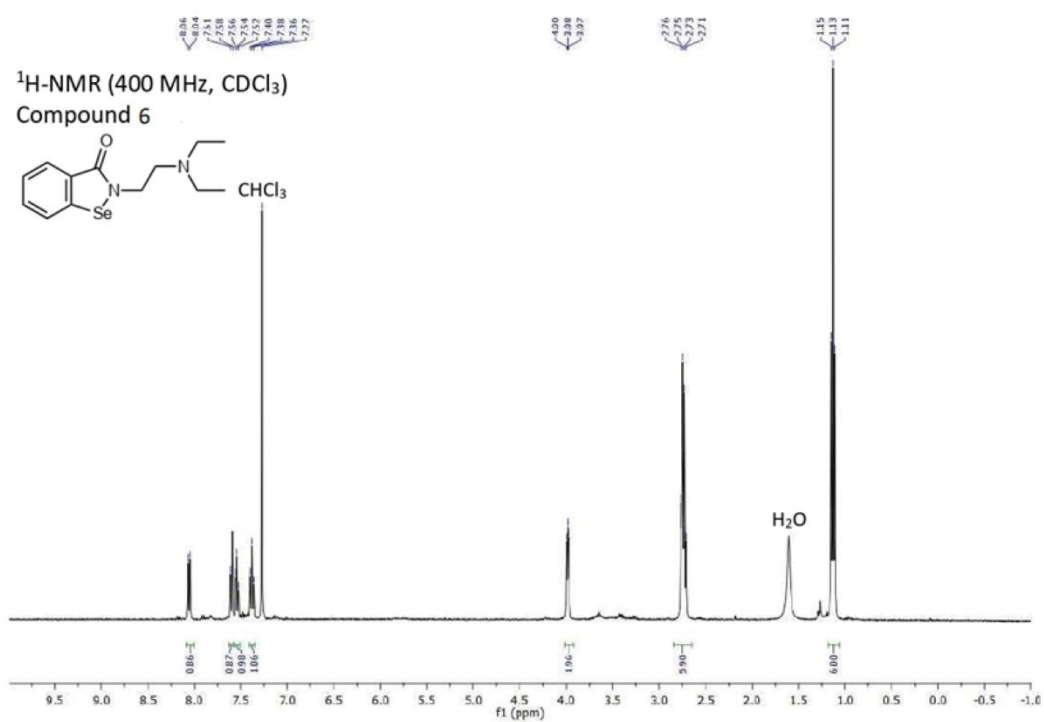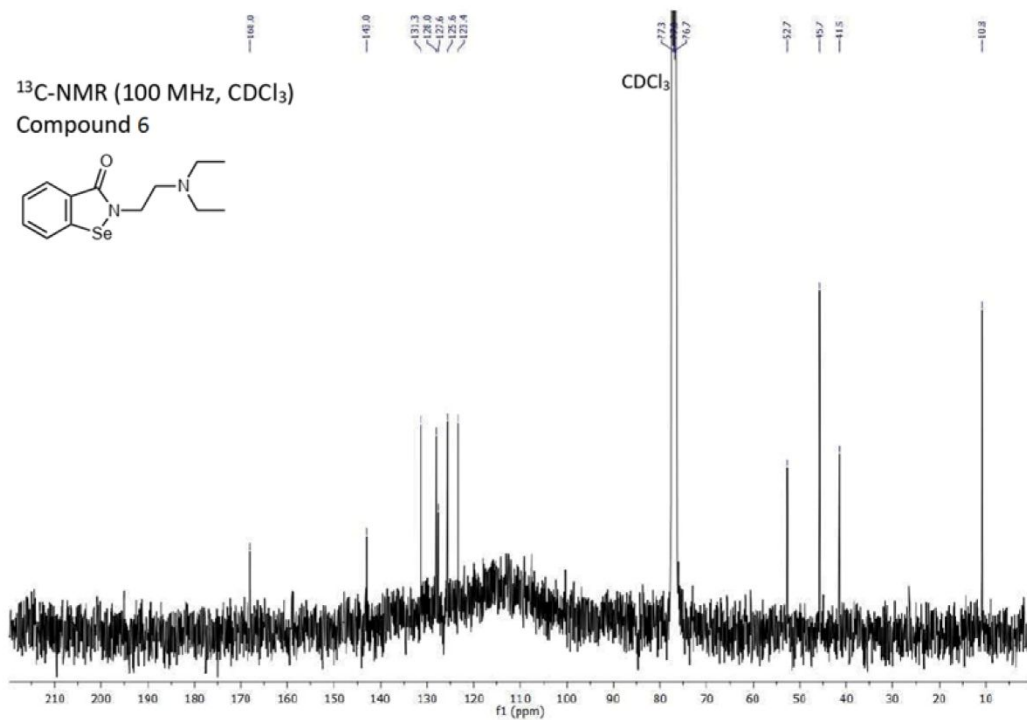

Figure S7 C

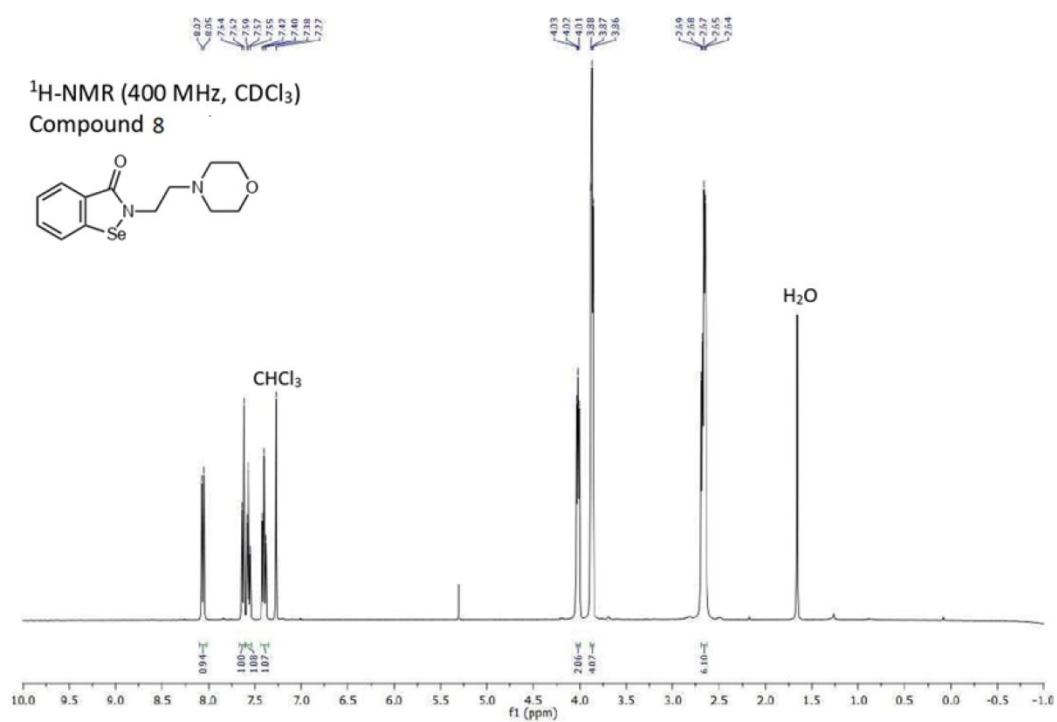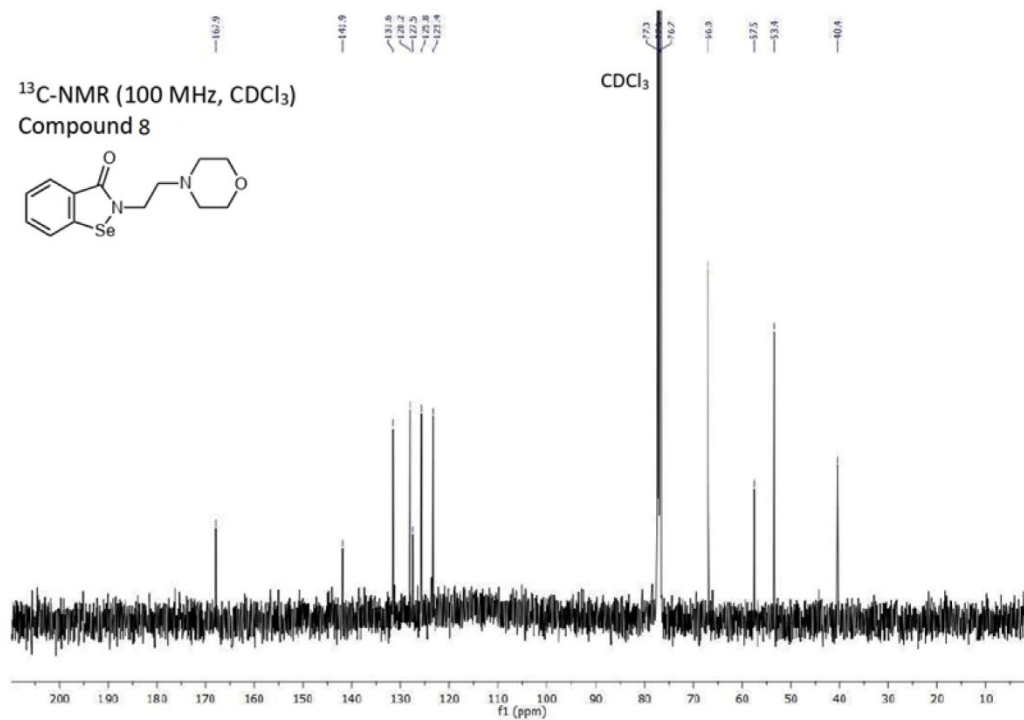

Figure S7 D

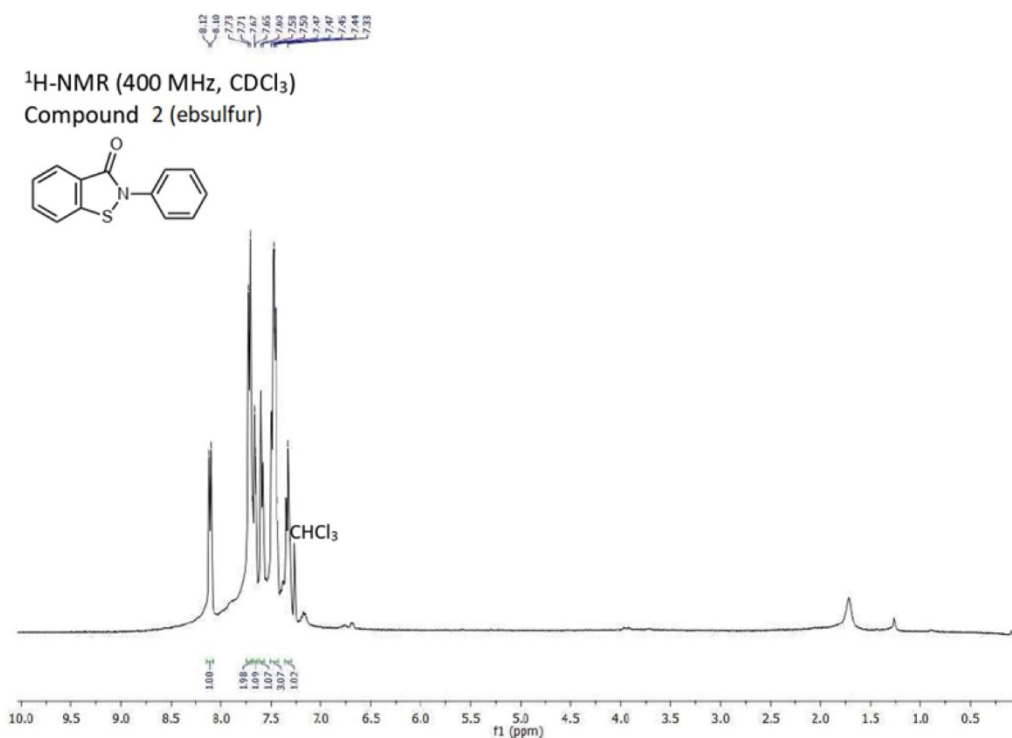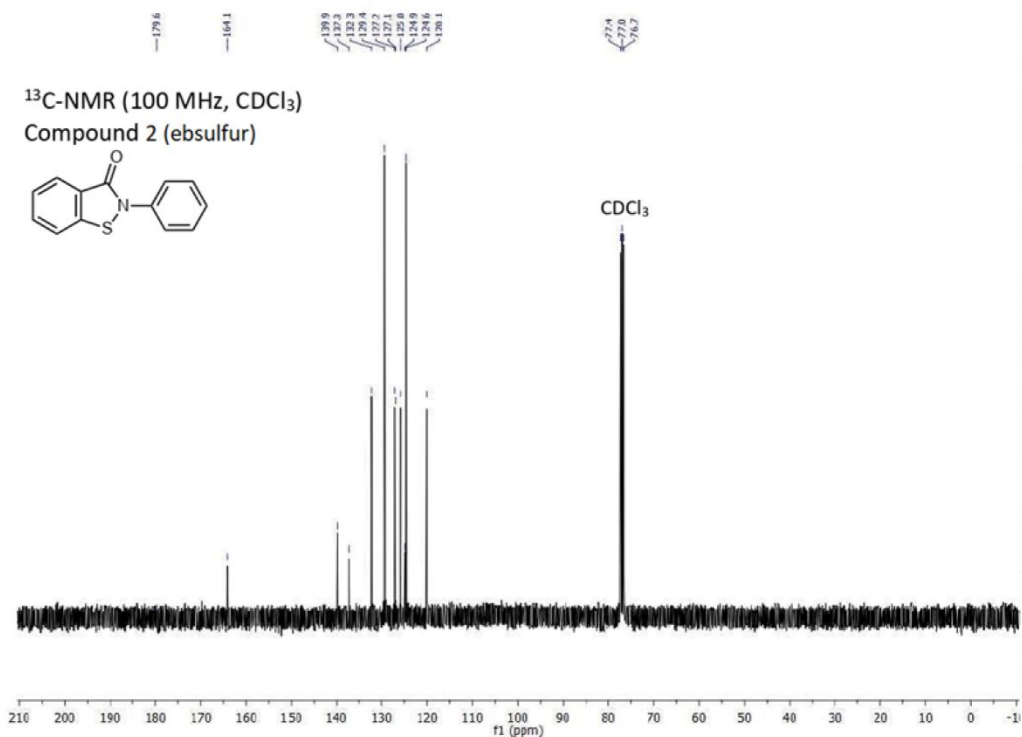

Figure S7 E

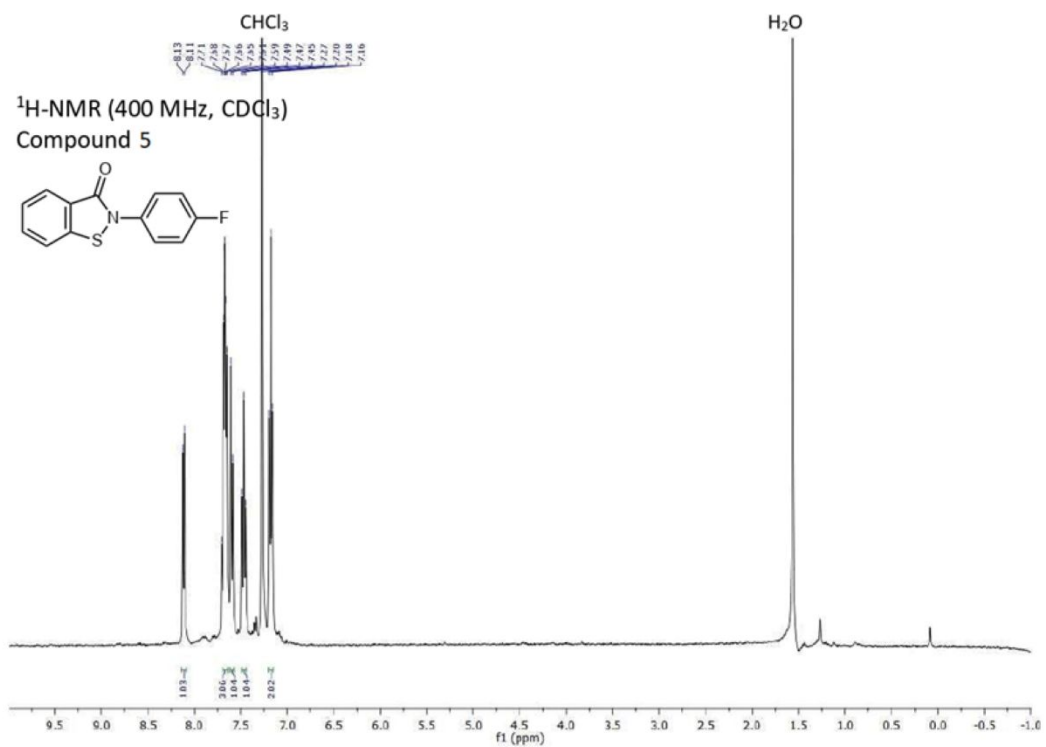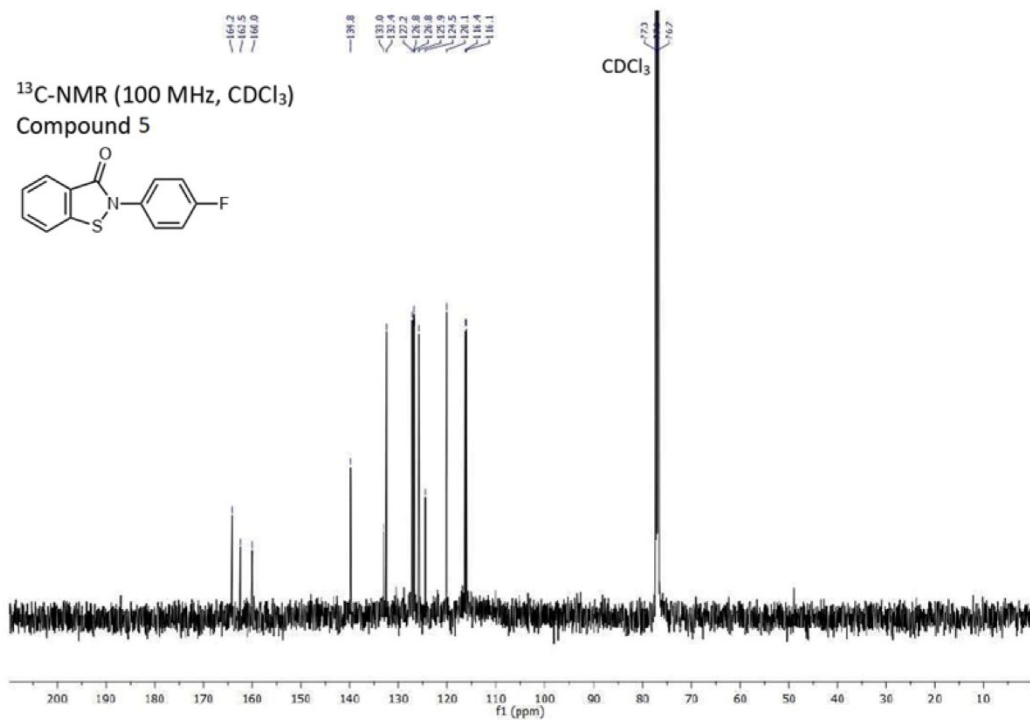

Figure S7 F

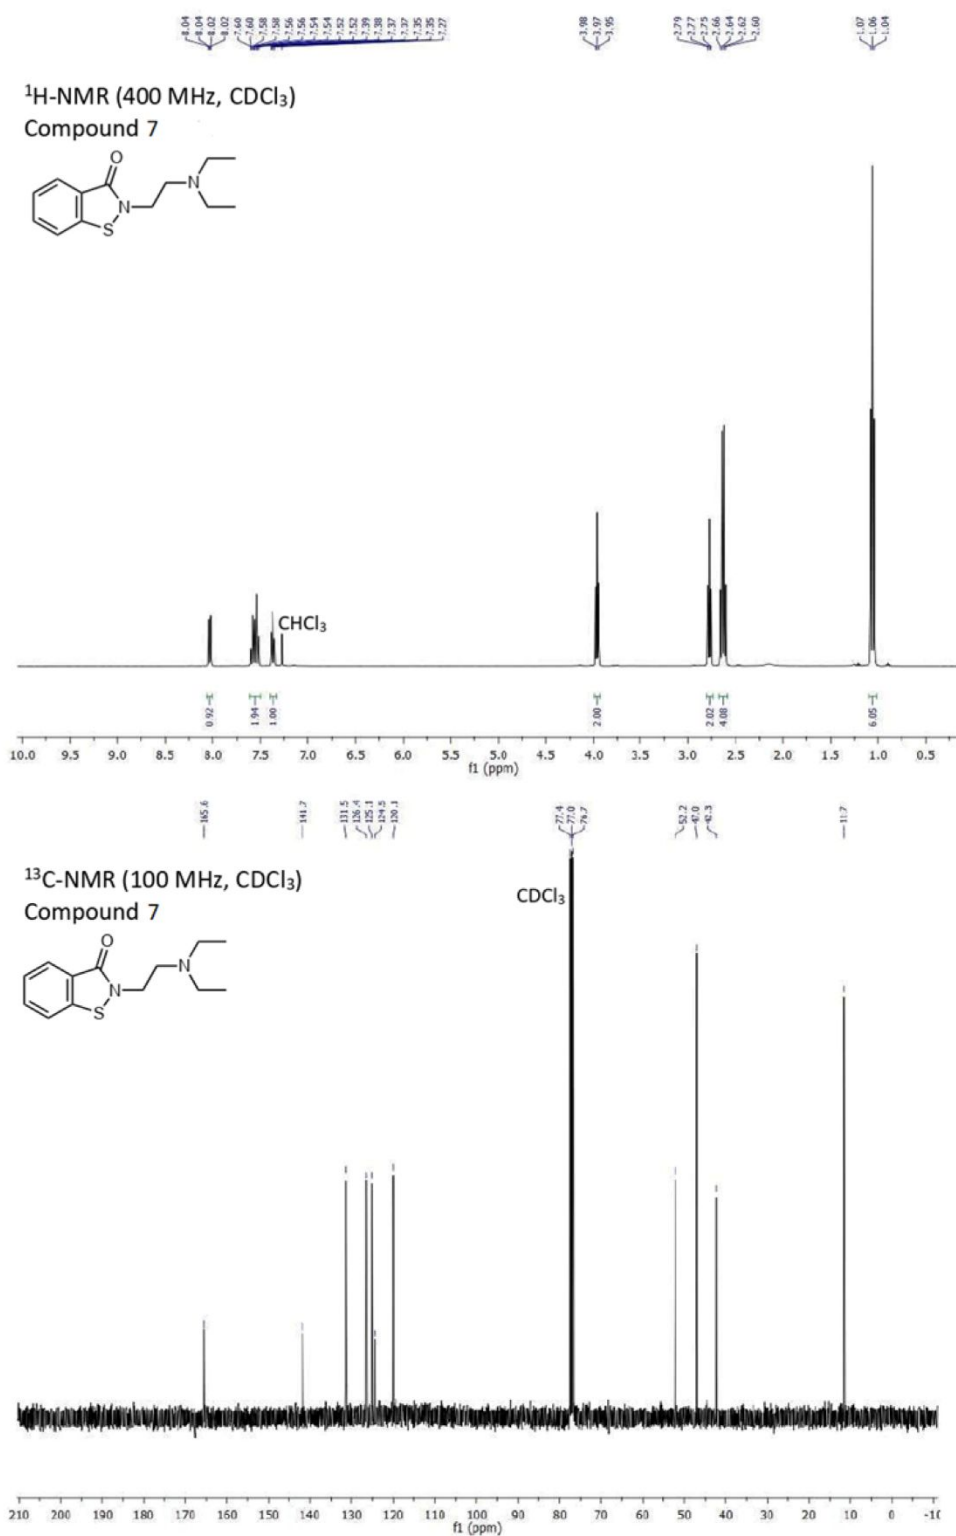

Figure S7 G

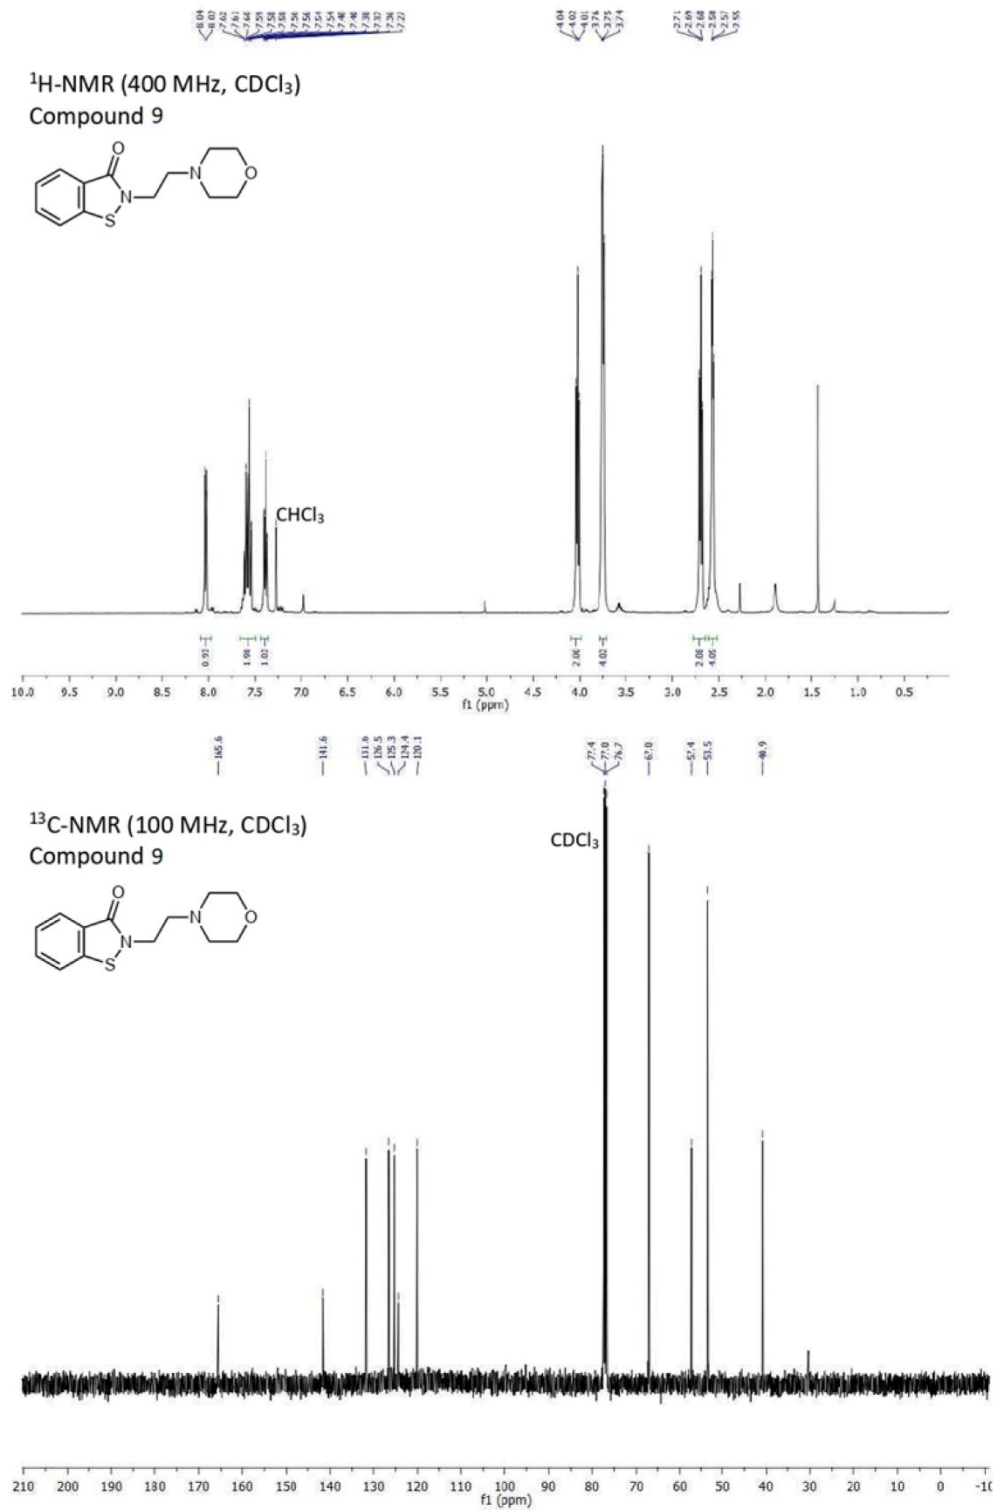

Figure S7 H

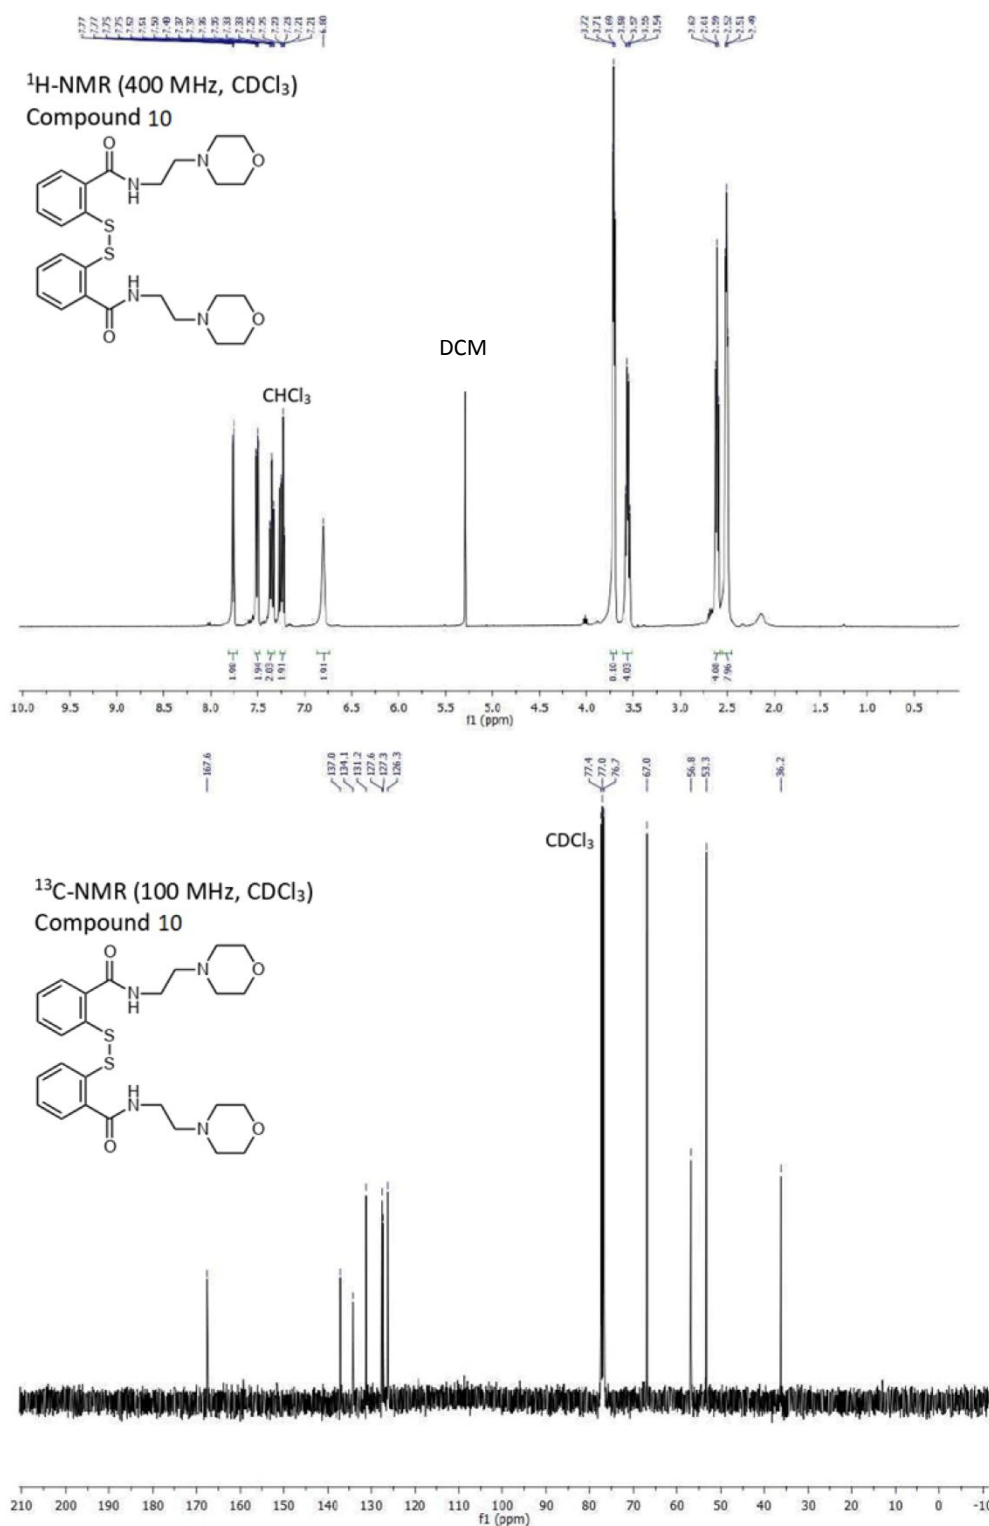

**Supplementary Figure 7.** NMR spectra of Ebselen analogues, A) compound 4, B) compound 2, C) compound 8, D) compound 6, E) compound 5, F) compound 7, G) compound 9, H) compound 10.





Figure S8 A

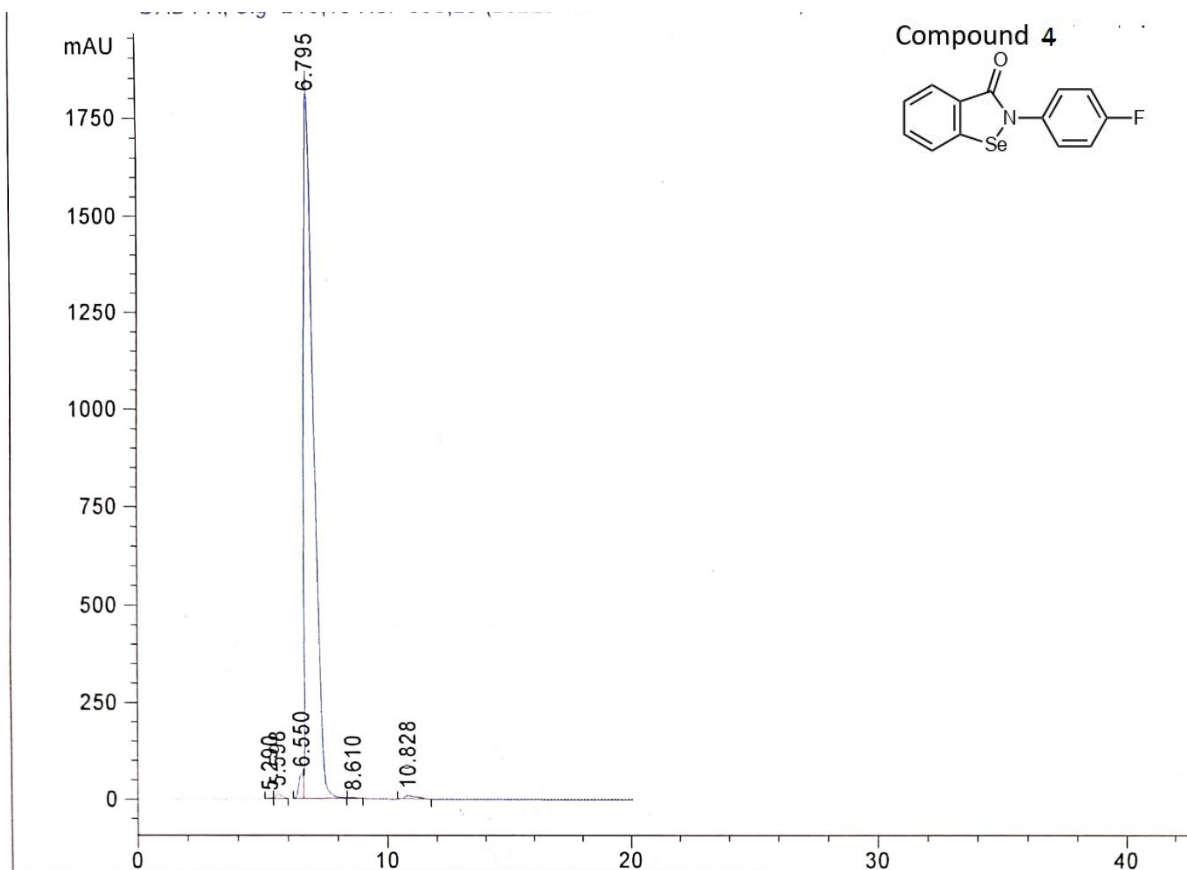

Compound 4

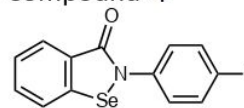

=====  
 Area Percent Report  
 =====

Sorted By : Signal  
 Multiplier : 1.0000  
 Dilution : 1.0000  
 Use Multiplier & Dilution Factor with ISTDs

Signal 1: DAD1 A, Sig=210,16 Ref=390,20

| Peak # | RetTime [min] | Type | Width [min] | Area [mAU*s] | Height [mAU] | Area %  |
|--------|---------------|------|-------------|--------------|--------------|---------|
| 1      | 5.290         | BV   | 0.1753      | 37.28167     | 3.21498      | 0.0751  |
| 2      | 5.598         | VV   | 0.2145      | 235.59427    | 15.39898     | 0.4746  |
| 3      | 6.550         | BV   | 0.2153      | 868.68274    | 65.24921     | 1.7499  |
| 4      | 6.795         | VB   | 0.3401      | 4.80978e4    | 1870.00928   | 96.8883 |
| 5      | 8.610         | BB   | 0.3624      | 72.32813     | 2.75364      | 0.1457  |
| 6      | 10.828        | BB   | 0.4811      | 330.83414    | 9.52754      | 0.6664  |

Totals : 4.96426e4 1966.15362

Figure S8 B

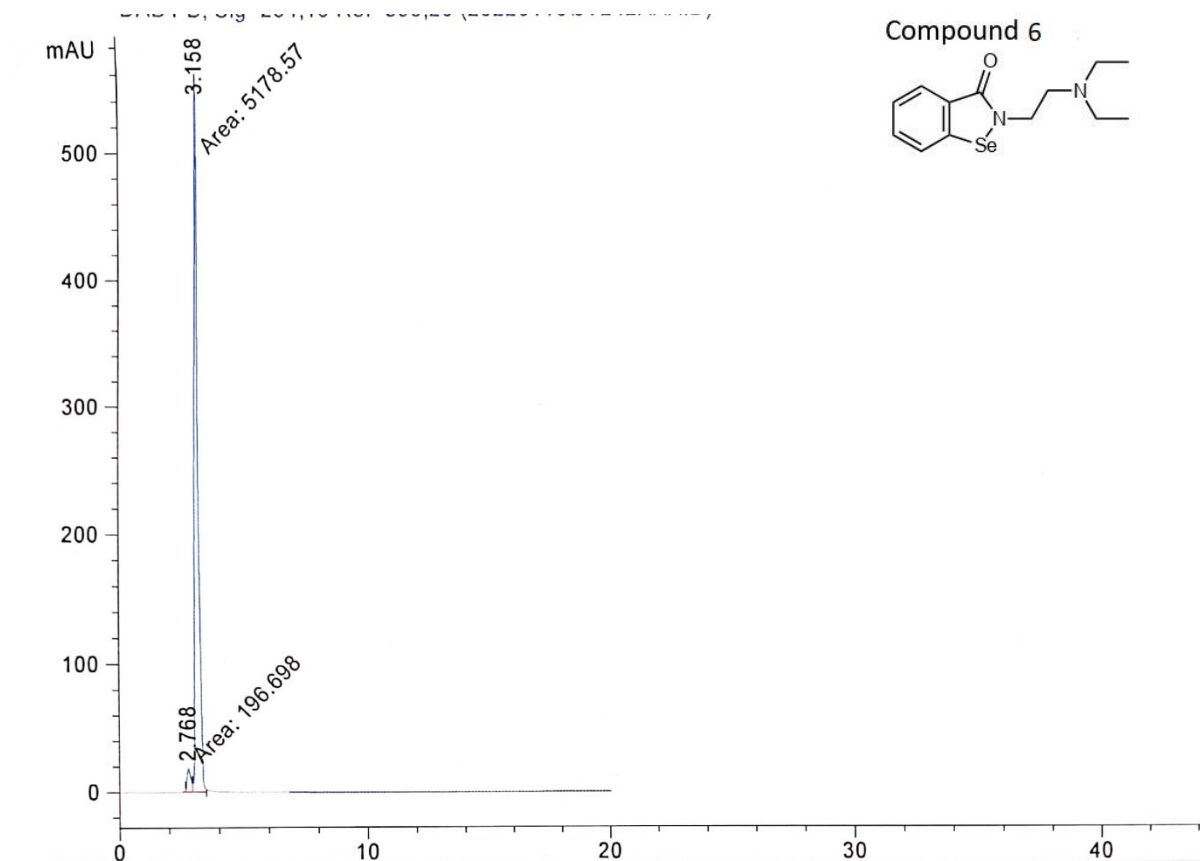

Compound 6

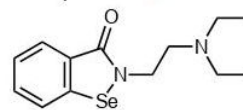

=====  
 Area Percent Report  
 =====

Sorted By : Signal  
 Multiplier : 1.0000  
 Dilution : 1.0000  
 Use Multiplier & Dilution Factor with ISTDs

Signal 1: DAD1 B, Sig=254,16 Ref=390,20

| Peak # | RetTime [min] | Type | Width [min] | Area [mAU*s] | Height [mAU] | Area %  |
|--------|---------------|------|-------------|--------------|--------------|---------|
| 1      | 2.768         | MF   | 0.1758      | 196.69844    | 18.65268     | 3.6593  |
| 2      | 3.158         | FM   | 0.1526      | 5178.57373   | 565.44519    | 96.3407 |

Totals : 5375.27217 584.09787

Figure S8 C

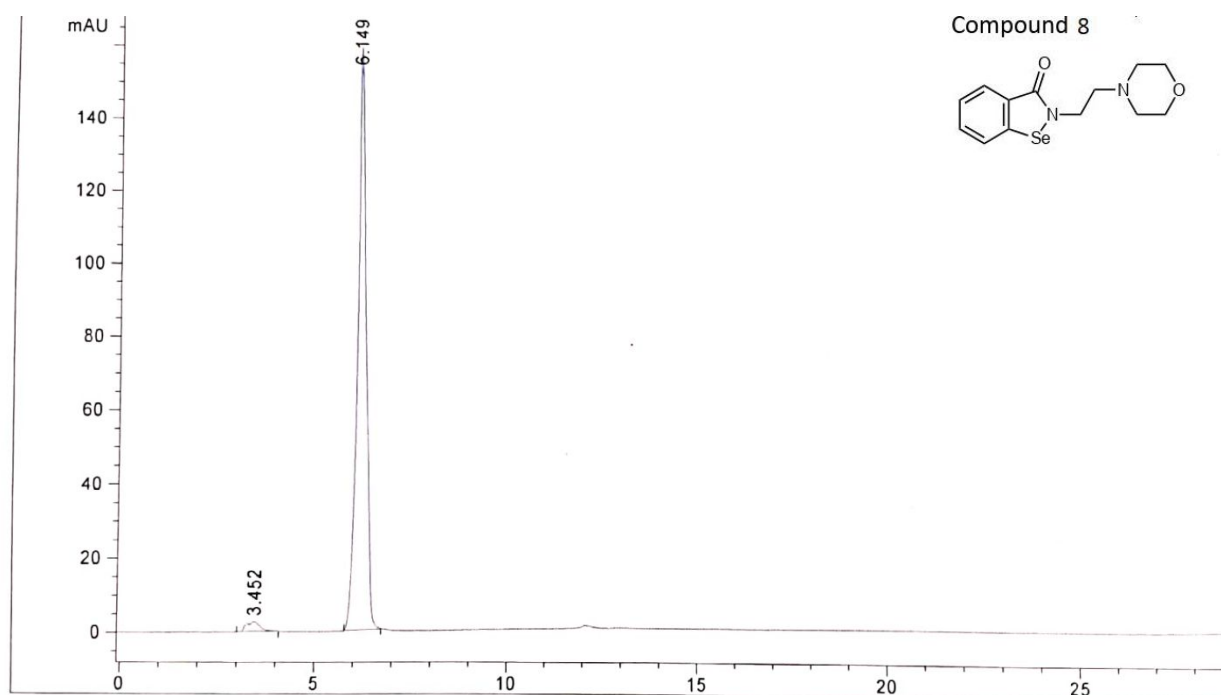

Compound 8

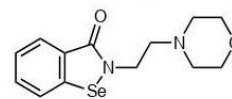

=====  
 Area Percent Report  
 =====

Sorted By : Signal  
 Multiplier : 1.0000  
 Dilution : 1.0000  
 Use Multiplier & Dilution Factor with ISTDs

Signal 1: DAD1 B, Sig=254,16 Ref=390,20

| Peak # | RetTime [min] | Type | Width [min] | Area [mAU*s] | Height [mAU] | Area %  |
|--------|---------------|------|-------------|--------------|--------------|---------|
| 1      | 3.452         | BB   | 0.3430      | 68.82885     | 2.79771      | 2.7359  |
| 2      | 6.149         | BB   | 0.2143      | 2446.98145   | 160.09654    | 97.2641 |

Figure S8 D

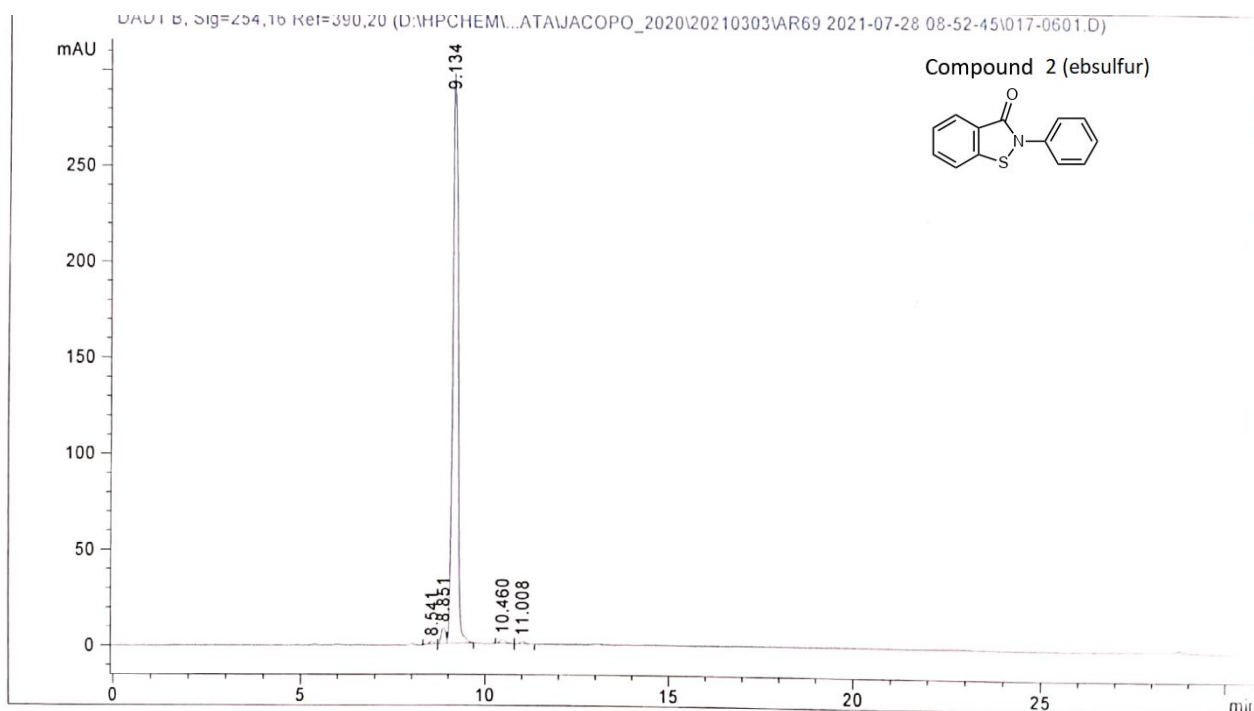

=====  
 Area Percent Report  
 =====

Sorted By : Signal  
 Multiplier : 1.0000  
 Dilution : 1.0000  
 Use Multiplier & Dilution Factor with ISTDs

Signal 1: DAD1 B, Sig=254,16 Ref=390,20

| Peak # | RetTime [min] | Type | Width [min] | Area [mAU*s] | Height [mAU] | Area %  |
|--------|---------------|------|-------------|--------------|--------------|---------|
| 1      | 8.541         | BV   | 0.1736      | 17.89709     | 1.66301      | 0.5688  |
| 2      | 8.851         | VV   | 0.1467      | 80.19249     | 8.76839      | 2.5485  |
| 3      | 9.134         | VB   | 0.1605      | 3002.78857   | 300.59180    | 95.4294 |
| 4      | 10.460        | BB   | 0.1804      | 29.54241     | 2.52703      | 0.9389  |
| 5      | 11.008        | BB   | 0.1678      | 16.18805     | 1.52592      | 0.5145  |

Figure S8 E

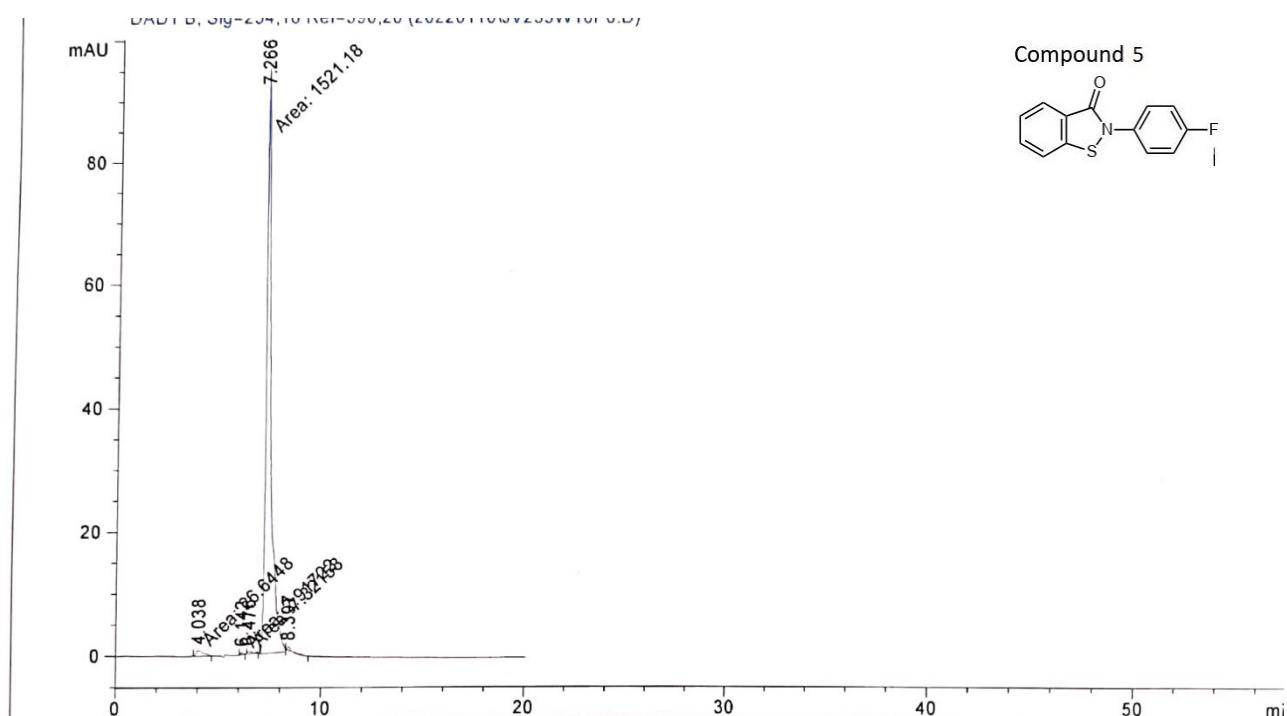

Compound 5

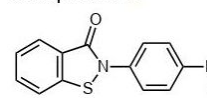

=====  
 Area Percent Report  
 =====

Sorted By : Signal  
 Multiplier : 1.0000  
 Dilution : 1.0000  
 Use Multiplier & Dilution Factor with ISTDs

Signal 1: DAD1 B, Sig=254,16 Ref=390,20

| Peak # | RetTime [min] | Type | Width [min] | Area [mAU*s] | Height [mAU] | Area %  |
|--------|---------------|------|-------------|--------------|--------------|---------|
| 1      | 4.038         | MM   | 0.4595      | 26.64482     | 9.66390e-1   | 1.7096  |
| 2      | 6.142         | MM   | 0.1453      | 2.91722      | 3.34672e-1   | 0.1872  |
| 3      | 6.476         | MM   | 0.3135      | 7.32158      | 3.89217e-1   | 0.4698  |
| 4      | 7.266         | MM   | 0.2660      | 1521.17834   | 95.32454     | 97.6013 |
| 5      | 8.397         | BB   | 0.0494      | 5.02014e-1   | 6.24825e-1   | 0.0322  |

Totals : 1558.56398 97.63964

Figure S8 F

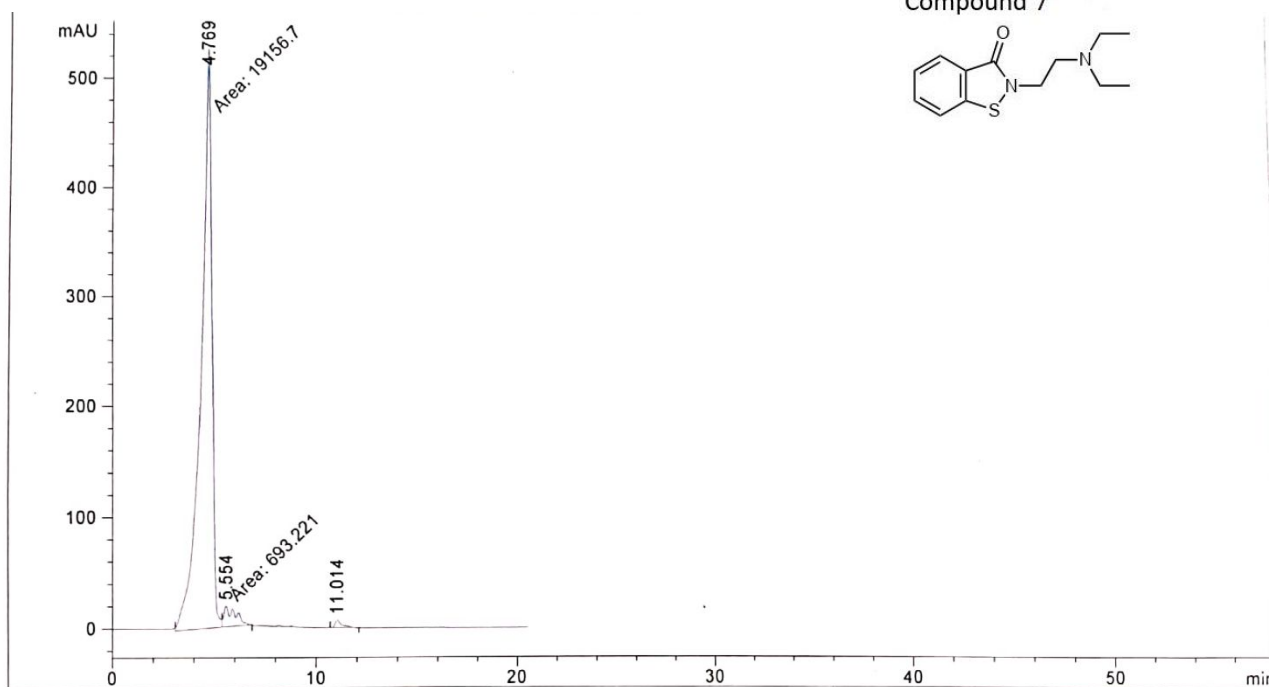

Compound 7

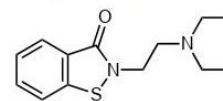

=====  
 Area Percent Report  
 =====

Sorted By : Signal  
 Multiplier : 1.0000  
 Dilution : 1.0000  
 Use Multiplier & Dilution Factor with ISTDs

Signal 1: DAD1 B, Sig=254,16 Ref=390,20

| Peak # | RetTime [min] | Type | Width [min] | Area [mAU*s] | Height [mAU] | Area %  |
|--------|---------------|------|-------------|--------------|--------------|---------|
| 1      | 4.769         | MF   | 0.6065      | 1.91567e4    | 526.43036    | 95.7333 |
| 2      | 5.554         | FM   | 0.6036      | 693.22144    | 19.14192     | 3.4643  |
| 3      | 11.014        | VB   | 0.3318      | 160.56773    | 6.79176      | 0.8024  |

Totals : 2.00105e4 552.36404

Figure S8 G

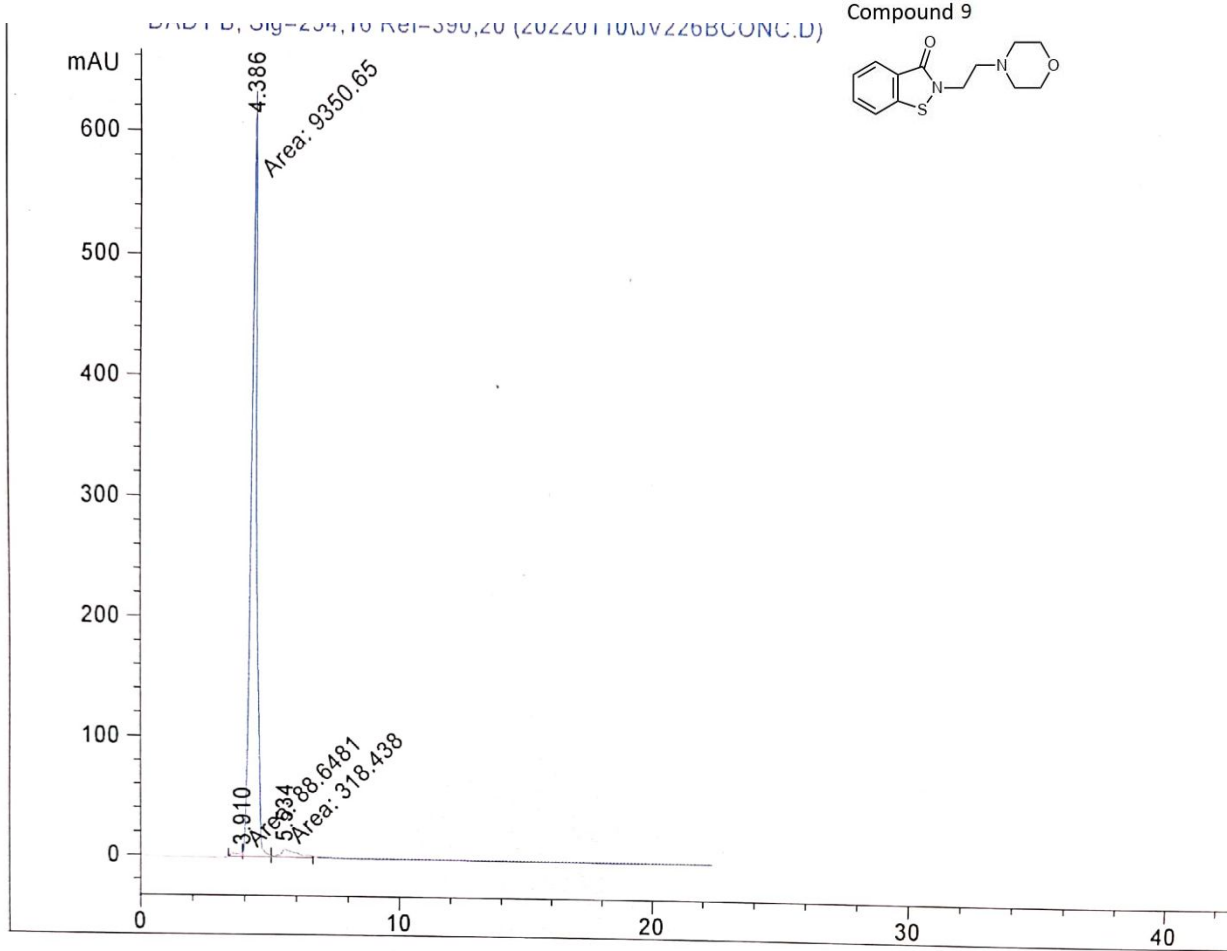

=====  
 Area Percent Report  
 =====

Sorted By : Signal  
 Multiplier : 1.0000  
 Dilution : 1.0000  
 Use Multiplier & Dilution Factor with ISTDs

Signal 1: DAD1 B, Sig=254,16 Ref=390,20

| Peak # | RetTime [min] | Type | Width [min] | Area [mAU*s] | Height [mAU] | Area %  |
|--------|---------------|------|-------------|--------------|--------------|---------|
| 1      | 3.910         | MF   | 0.3720      | 88.64809     | 3.97141      | 0.9085  |
| 2      | 4.386         | MF   | 0.2450      | 9350.64746   | 636.16852    | 95.8281 |
| 3      | 5.534         | MF   | 0.7106      | 318.43823    | 7.46870      | 3.2634  |

Totals : 9757.73379 647.60862

Figure S8 H

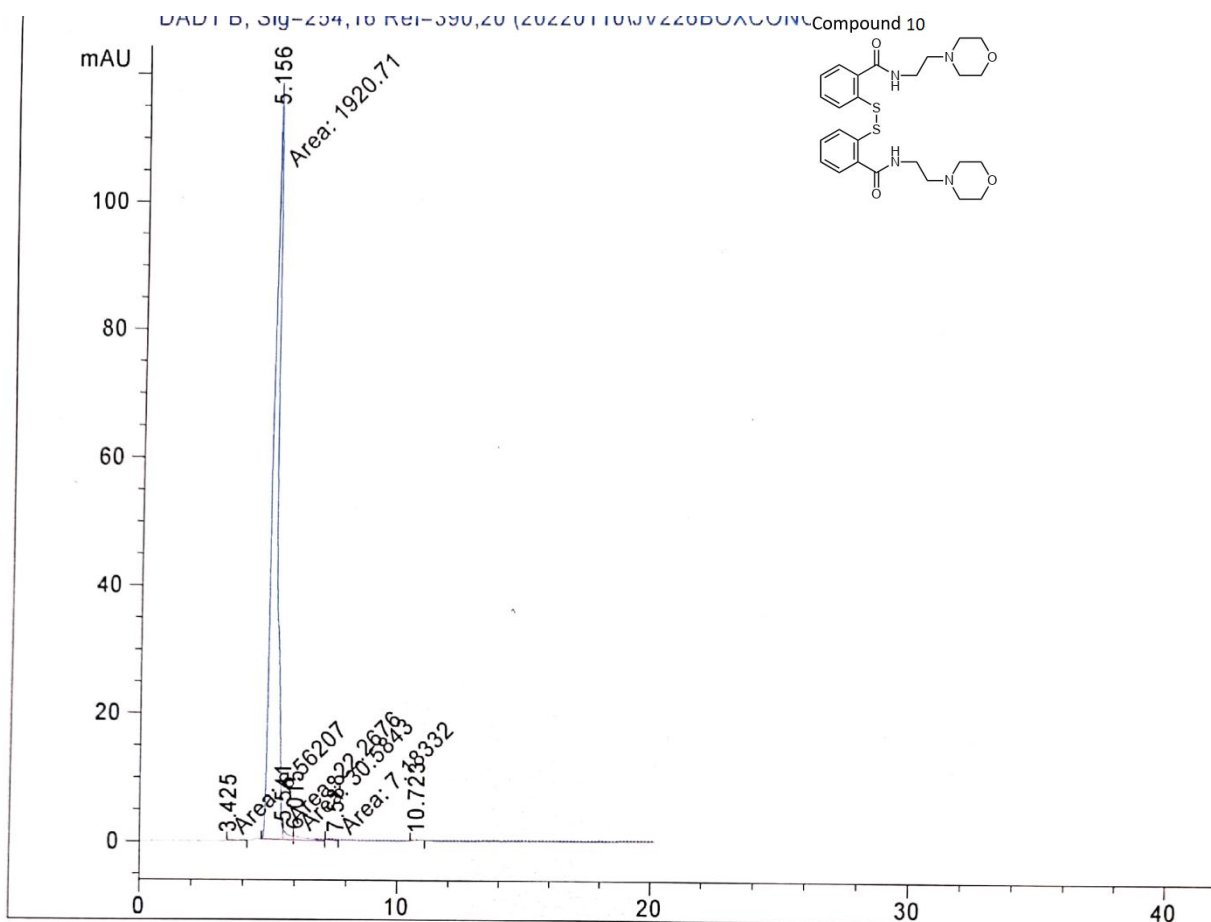

=====  
 Area Percent Report  
 =====

Sorted By : Signal  
 Multiplier : 1.0000  
 Dilution : 1.0000  
 Use Multiplier & Dilution Factor with ISTDs

Signal 1: DAD1 B, Sig=254,16 Ref=390,20

| Peak # | RetTime [min] | Type | Width [min] | Area [mAU*s] | Height [mAU] | Area %  |
|--------|---------------|------|-------------|--------------|--------------|---------|
| 1      | 3.425         | MM   | 0.4670      | 6.56207      | 2.34169e-1   | 0.3300  |
| 2      | 5.156         | MF   | 0.2697      | 1920.70996   | 118.68906    | 96.5821 |
| 3      | 5.541         | MF   | 0.2091      | 22.26765     | 1.74417      | 1.1197  |
| 4      | 6.015         | FM   | 0.7073      | 30.58435     | 7.20714e-1   | 1.5379  |
| 5      | 7.588         | MM   | 0.4445      | 7.18332      | 2.69313e-1   | 0.3612  |
| 6      | 10.723        | BB   | 0.2176      | 1.37417      | 8.63845e-2   | 0.0691  |

Totals : 1988.68151 121.74381



**Supplementary Figure 8.** HPLC analysis of Ebselen analogues: A) compound **4** (RP18 isocratic MeOH/Water 9:1 flow 0.5 mL/min); B) compound **6** (RP18 isocratic MeOH/Water 9:1 flow 0.5 mL/min); C) compound **8** (RP18 gradient ACN/Water 3:7 to 8:2 flow 1 mL/min); D) compound **2** (RP18 gradient ACN/Water 3:7 to 8:2 flow 1 mL/min); E) compound **5** (RP18 isocratic MeOH/Water 9:1 flow 0.5 mL/min); F) compound **7** (RP18 isocratic MeOH/Water 9:1 flow 0.5 mL/min); G) compound **9** (RP18 isocratic MeOH/Water 9:1 flow 0.5 mL/min); H) compound **10** (RP18 isocratic MeOH/Water 9:1 flow 0.5 mL/min).
